# Supplementary material for: Fabrication of one-dimensional heterostructured TiO2@SnO2with enhanced photocatalytic activity
Source: Royal Society of Chemistry journal article supplement (doi:10.1039/c3ta12863f), 2013-10-15
Supplement: c3ta12863f.pdf [file c3ta12863f.pdf]

## Supporting Information

### **Fabrication of one-dimensional heterostructured TiO<sub>2</sub>@SnO<sub>2</sub> with enhanced photocatalytic activity**

Xin Xu,<sup>a§</sup> Guorui Yang,<sup>b§</sup> Jin Liang,<sup>a</sup> Shujiang Ding,<sup>a\*</sup> Chengli Tang,<sup>b</sup>

Honghui Yang,<sup>b</sup> Wei Yan,<sup>b,c</sup> Guidong Yang,<sup>d\*</sup> and Demei Yu<sup>a\*</sup>

<sup>a</sup>State Key Laboratory for Mechanical Behavior of Materials and Department of Applied Chemistry, School of Science, Xi'an Jiaotong University, Xi'an 710049, China

<sup>b</sup>Department of Environmental Science & Engineering, Xi'an Jiaotong University, Xi'an 710049, China

<sup>c</sup>State Key Laboratory of Multiphase Flow in Power Engineering, Xi'an Jiaotong University, Xi'an 710049, China

<sup>d</sup>Department of Chemical Engineering, School of Chemical Engineering and Technology, Xi'an Jiaotong University, Xi'an, 710049, China

<sup>§</sup>Xin Xu and Guorui Yang contributed equally to this work.

\*To whom correspondence should be addressed, [dingsj@mail.xjtu.edu.cn](mailto:dingsj@mail.xjtu.edu.cn); [guidongyang@mail.xjtu.edu.cn](mailto:guidongyang@mail.xjtu.edu.cn) and [dmyu@mail.xjtu.edu.cn](mailto:dmyu@mail.xjtu.edu.cn)

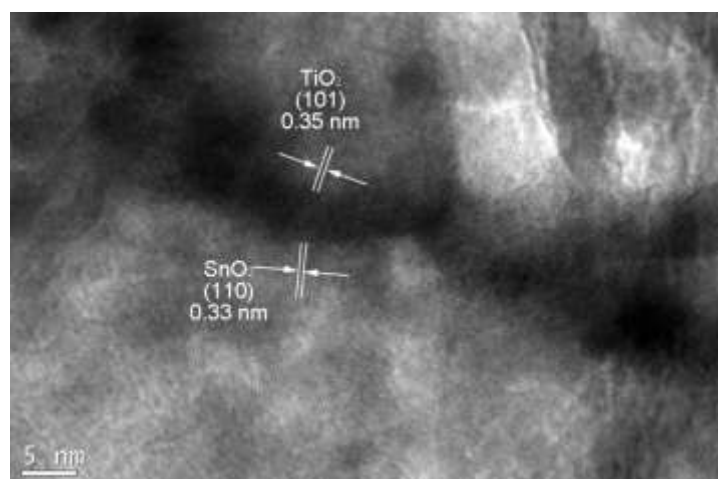

**Fig. S1** HRTEM image of TiO<sub>2</sub>@SnO<sub>2</sub> composite.

The chemical compositions and electronic structures of TiO<sub>2</sub>@SnO<sub>2</sub> composite and SnO<sub>2</sub> nanotubes were analyzed by XPS, respectively. Fig. S2 A exhibits the survey spectra of TiO<sub>2</sub>@SnO<sub>2</sub> composite and SnO<sub>2</sub> nanotubes, from which it can be clearly observed that the peaks of Sn, Ti and O exist in sample TiO<sub>2</sub>@SnO<sub>2</sub> composite. In contrast, only the peaks belonging to Sn and O exist in SnO<sub>2</sub> nanotubes. The high-resolution XPS spectrum of Ti 2p orbital region (Fig. S2 B) for TiO<sub>2</sub>@SnO<sub>2</sub> composite shows the binding energies of Sn 3d<sub>5/2</sub> and Sn 3d<sub>3/2</sub> peaks at 487.2eV and 495.5 eV, respectively. The splitting energy of 8.3eV between Sn 3d<sub>5/2</sub> and Sn 3d<sub>3/2</sub> is a typical value for Sn<sup>4+</sup> in SnO<sub>2</sub> nanotubes. Similar as pure SnO<sub>2</sub> nanotubes, the peaks for Sn 3d in the sample TiO<sub>2</sub>@SnO<sub>2</sub> composite and pristine SnO<sub>2</sub> nanotubes show no obvious shift (Fig. S2 B), suggesting that the structure of SnO<sub>2</sub> nanotubes remained intact after the hydrothermal treatment. However, the intensities of the characteristic peaks of the Sn 3d became lower obviously after hydrothermal process because of the presence of TiO<sub>2</sub> coating layer, since the XPS spectra only reveals the material properties with depth of nanometers from the surface. The spectra of O1s, Ti 3d 2p

and VB are also shown in Fig. S2 C, D and E, respectively. As shown in Fig. S2 C, the shape of asymmetric peaks of O 1s spectrum indicate that crystal lattice oxygen ( $O_{M-O}$ ), surface hydroxyl groups ( $O_{O-H}$ ) and adsorbed water presented simultaneously in the as-fabricated samples. The peaks located at 459.3 and 465.1eV correspond to the Ti  $2p_{3/2}$  and Ti  $2p_{1/2}$  states (Fig. S2 D ), indicating the presence of  $Ti^{4+}$ . As shown in Fig. S2 E, the valence band edge of  $SnO_2$  is derived by the linear extrapolation method to be 3.45eV. The valence band edge of  $TiO_2@SnO_2$  composite is estimated to be 3.05 eV due to the  $e^-$  transformation from  $TiO_2$  to the  $SnO_2$ , which can lead to the increasing of the Fermi level in  $SnO_2$ , consequently the valence band edge also raises up.

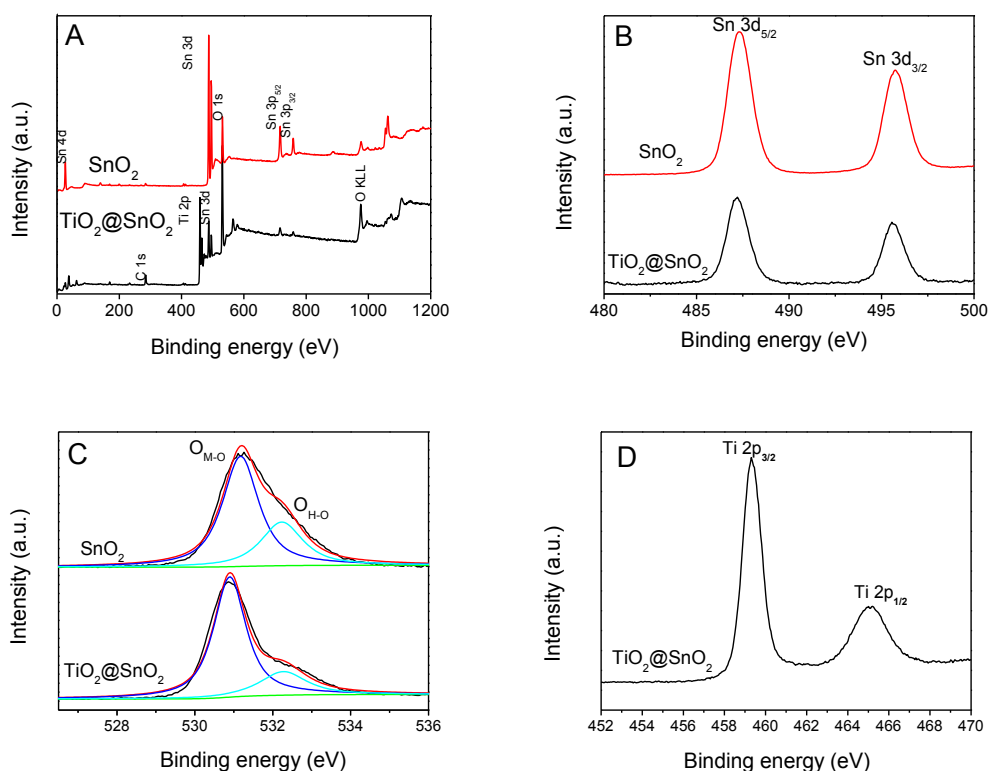

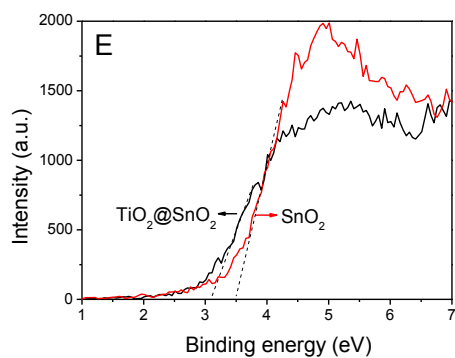

**Fig. S2** XPS test of  $\text{SnO}_2$  nanotubes and  $\text{TiO}_2@\text{SnO}_2$  composite: (A) survey, (B) Sn 3d, (C) O 1s, (D) Ti 2p, (E) valence band (VB).

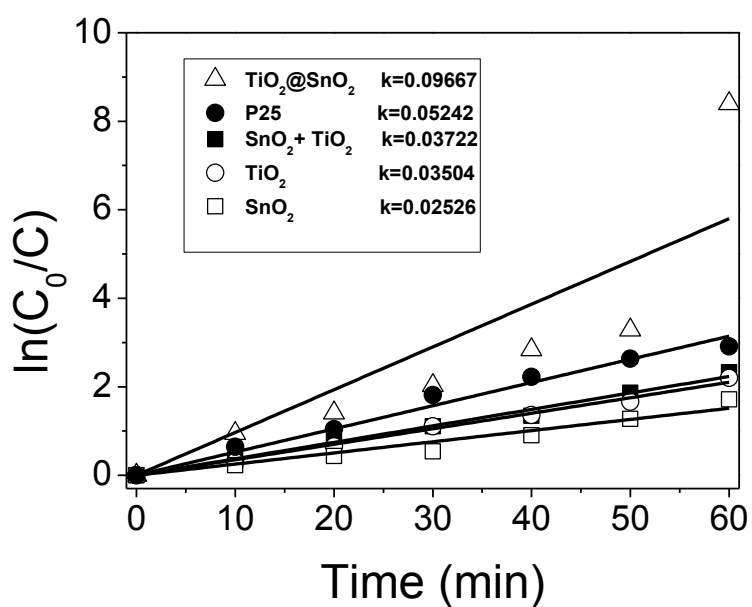

**Fig. S3** The pseudo first order kinetics of degradation of RhB over  $\text{TiO}_2@\text{SnO}_2$  composite, P25,  $\text{TiO}_2+\text{SnO}_2$  mixture,  $\text{TiO}_2$  nanosheets and  $\text{SnO}_2$  nanotubes samples with time of irradiation (min).

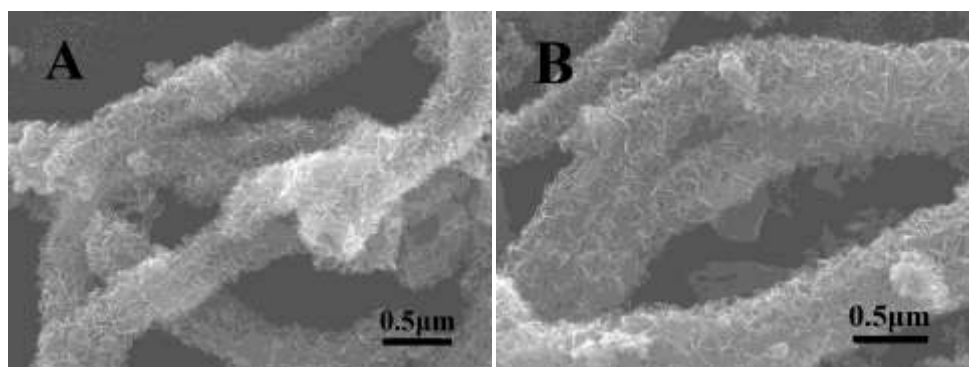

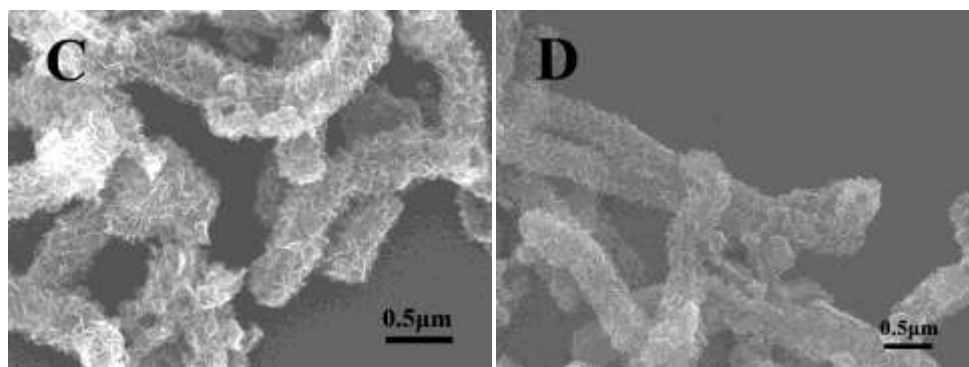

**Fig. S4** The morphology of the sample after catalytic reaction at different reaction time: (A) 6h, (B) 12h, (C) 18h, (D) 24h.
